# Supplementary material for: Monitoring the state of charge of vanadium redox flow batteries with an EPR-on-a-Chip dipstick sensor
Source: Royal Society of Chemistry journal article supplement (doi:10.1039/d4cp00373j), 2024-01-01
Supplement: d4cp00373j3.pdf [file d4cp00373j3.pdf]

## Supplementary information

### S1 Quantitation using the DI method

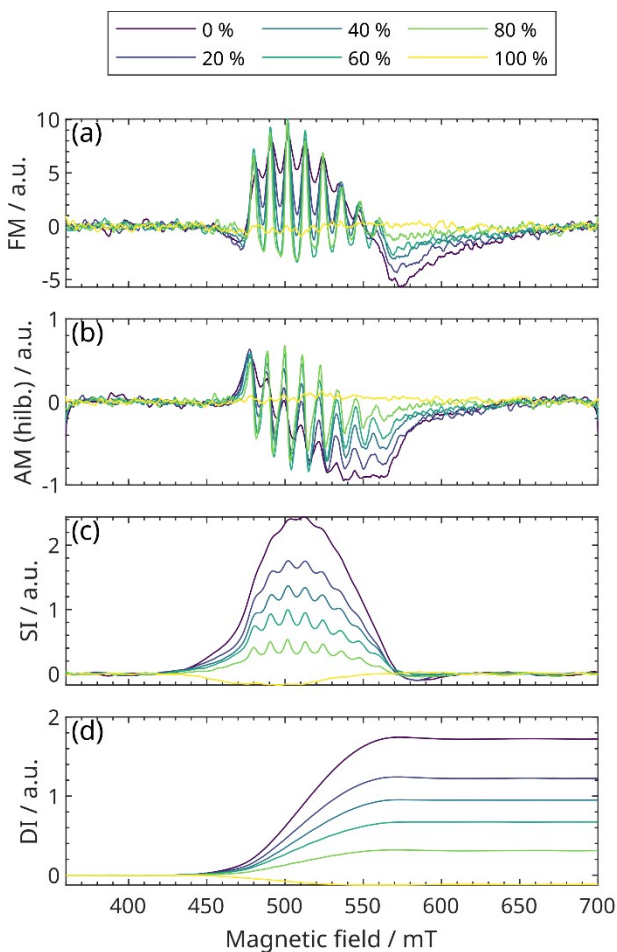

Figure S1 Quantitation of the EPRoC FM signal after the Hilbert transformation via the Kramers-Kronig relation followed by double integration.

### S2 Estimation of the absolute spin sensitivity of the EPRoC sensor

The absolute spin sensitivity of an EPRoC sensor may be estimated using Eq. (70) in ref. <sup>45</sup>:

$$N_{min} = \frac{24k_B^{3/2}T^{3/2}\sqrt{R_{coil}}}{\gamma^3\hbar^2B_uB_0^2}$$

where  $k_B$  is the Boltzmann constant,  $T$  is the temperature,  $\gamma$  is the gyromagnetic ratio,  $\hbar$  is the reduced Planck's constant,  $R_{coil}$  is the resistance of the coil,  $B_0$  is the static magnetic field and  $B_u$  is the unitary magnetic field of the coil. The latter may be approximated by

$$B_u \approx \frac{\mu_0}{d_{coil}}$$

where  $\mu_0$  is the magnetic constant and  $d_{coil}$  is the diameter of the coil. For  $B_0 = 500$  mT,  $T = 300$  K,  $R_{coil} = 6.8$   $\Omega$ ,  $d_{coil} = 200$   $\mu\text{m}$ , we obtain approximately  $2 \cdot 10^8$  spins.

### S3 X-band saturation data of the electrolyte solutions

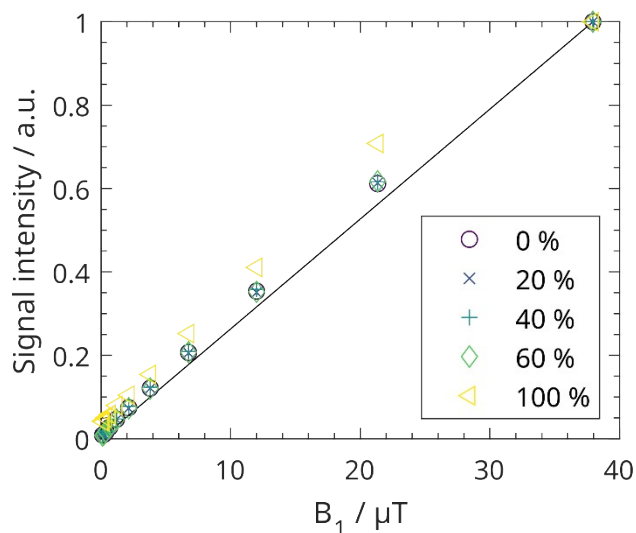

Figure S2 Saturation behaviour of the vanadium electrolyte samples at X-band.
