# Supplementary figures and images for: Monitoring the state of charge of vanadium redox flow batteries with an EPR-on-a-Chip dipstick sensor
Source: Royal Society of Chemistry journal article supplement (doi:10.1039/d4cp00373j), 2024-01-01

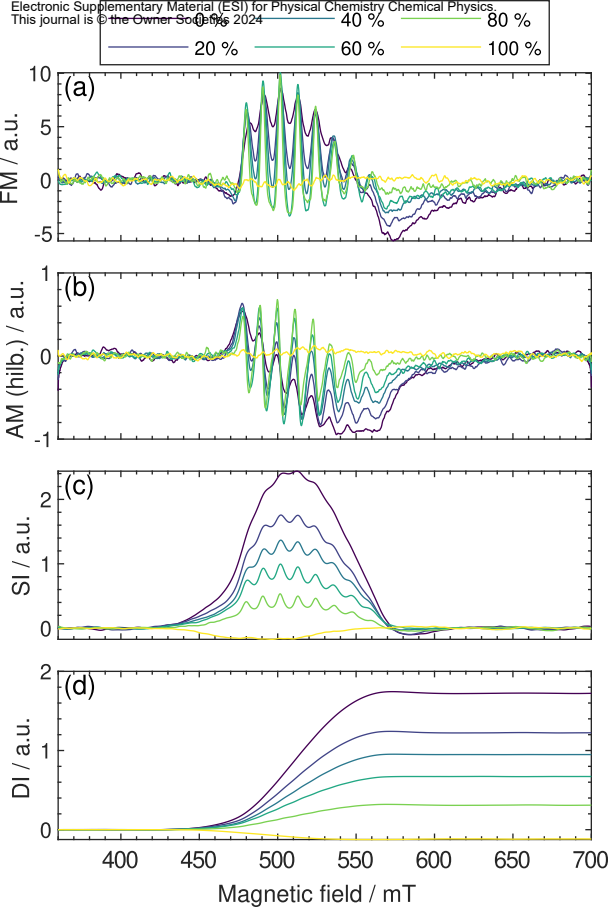

Supplement: d4cp00373j1.pdf [file d4cp00373j1.pdf]

Signal intensity / a.u.

0.8  
0.6  
0.4  
0.2  
0

0

10

20

30

40

$B_1 / \mu\text{T}$

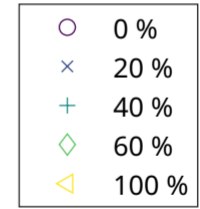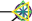

Supplement: d4cp00373j2.pdf [file d4cp00373j2.pdf]
